# Supplementary material for: Influence of Plasmid Type on the Replication of Rhodococcus equi in Host Macrophages
Source: PubMed Central journal article supplement (PMC5061997; doi:10.1128/msphere.00186-16), 2016-10-12

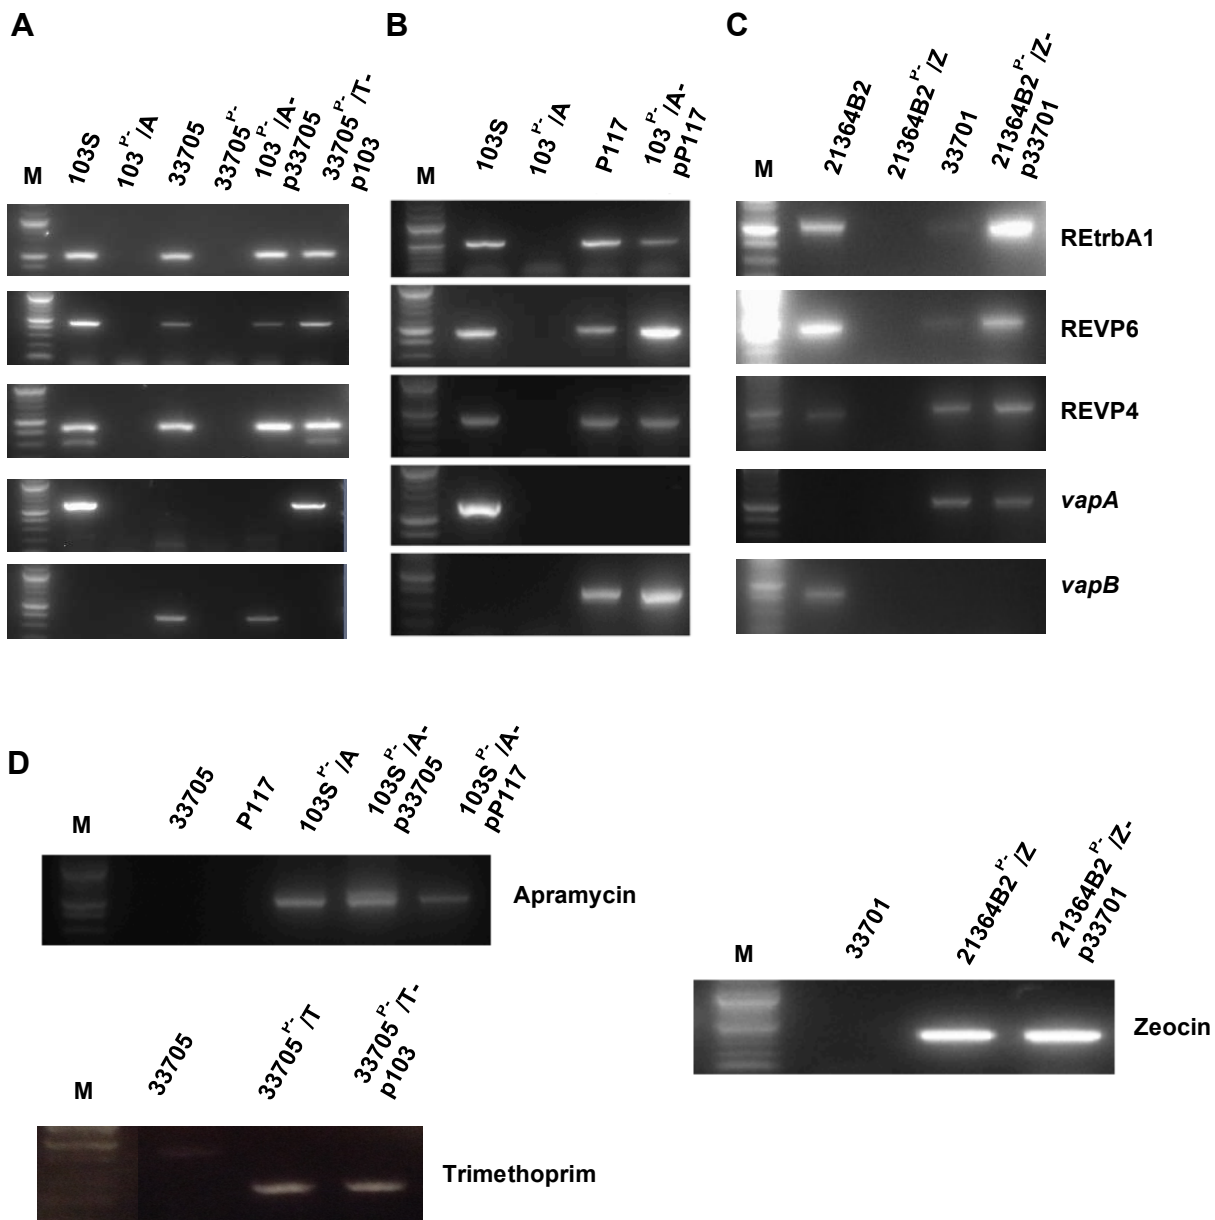

Supplement: sph005162162sf1.pdf [file sph005162162sf1.pdf]
